# Supplementary material
Source: MDPI journal article supplement (https://www.mdpi.com/2225-1154/6/3/63)
Supplement: s1 [file s1]

**Table S1.** Goodness of fit of the relationship between monthly precipitation and elevation by means of regression-based interpolation when one gauge station is removed from the population of available gauge stations.

|           | Rainfall (mm)  |                |
|-----------|----------------|----------------|
|           | Leeward        | Windward       |
|           | R <sup>2</sup> | R <sup>2</sup> |
| January   | 0.28           | 0.70           |
| February  | 0.45           | 0.55           |
| March     | 0.31           | 0.71           |
| April     | 0.72           | 0.92           |
| May       | 0.31           | 0.79           |
| June      | 0.18           | 0.66           |
| July      | 0.23           | 0.69           |
| August    | 0.08           | 0.69           |
| September | 0.25           | 0.68           |
| October   | 0.45           | 0.96           |
| November  | 0.42           | 0.90           |
| December  | 0.22           | 0.69           |
